# Supplementary material for: Design principles of the ESCRT-III Vps24-Vps2 module
Source: eLife. 2021 May 24;10:e67709. doi: 10.7554/eLife.67709 (PMC8143795; doi:10.7554/eLife.67709)
Supplement: Figure 1—source data 1. — In Supplement 1C, two datapoints are from fluorescence measurements with flow cytometry and the third data set is from an immunoblot of Mup1-pHluorin cleavage. In Supplement 1D, source data are for different expression levels of Vps2 with the doxycycline-inducible operator at different concentrations of doxycycline. Also included is the sequence of the promoter region of Vps2* (from random mutagenesis), associated with Figure 1—figure supplement 3D. [file elife-67709-fig1-data1.xls]

## Sheet: Fig 1
Fig 1A
Construct	Values	Average
Vector	-1.81094	0
Vector	-3.91864
Vector	5.72958
Vps24OE	99.6692	100
Vps24OE	100.279
Vps24OE	100.052
Vps2OE	44.3281	39.8848
Vps2OE	41.7881
Vps2OE	33.5382
Fig 1C
Construct	Values	Average
Vps2*	40.8751
Vps2*	49.167
Vps2*	47.0159	44.8573
Vps2*	42.3713
Vps2RM	45.9701
Vps2RM	55.5105
Vps2RM	50.0298	49.8392
Vps2RM	52.3933
Vps2RM	45.2922
WTVps24	99.9916
WTVps24	96.8226
WTVps24	100.466	99.4561
WTVps24	98.8937
WTVps24	101.107
WTVps2	5.2117
WTVps2	15.9629
WTVps2	-7.08537	4.3592
WTVps2	3.34757

## Sheet: Fig 1 Supp 1C
Fig 1 Supp 1C
Vps2 Fold Expression	Mup1-pHluorin Degradation (%) (Flow Cytometry)
1.03871	-5.81888
1.13548	1.22239
1.28387	-2.74275
2.03871	-0.720998
4.10968	10.4313
6.42581	5.01538
8.3871	21.1971
10.3871	29.0038
13.6774	19.9857
16.3871	41.1021
Vps2 Fold Expression	Mup1-pHluorin Degradation (%) (Flow Cytometry)
1.49825	5.82193
1.50755	1.2824
2.00726	2.15985
3.44944	8.04245
6.46005	4.74355
9.64443	45.2274
11.3915	55.5153
14.5089	44.7391
Vps2 Fold Expression	Mup1-pHluorin Degradation (%) (Immunoblot)
2.51961	1.1336
2.57843	1.91388
2.85294	3.04012
4.45098	4.74788
9.16667	22.0464
14.6078	58.2628
14.902	63.2683
15.2941	66.4336

## Sheet: Fig 1 Supp 1D
Fig 1 Supp 1D
Dox Conc (µg/mL)	Fold Change in Expression
0.25	1.49825
0.125	1.50755
0.0625	2.00726
0.03125	3.44944
0.015625	6.46005
0.0078125	9.64443
0.00390625	11.3915
0	14.5089

## Sheet: Fig 1 Supp 2A
Vps2 Constructs			Data1	Data2	Data3	Average	Standard Dev
N21K			-2.37202	11.0401	7.96972	5.54595	7.02691
E31K			8.04702	11.3583	9.38907	9.59814	1.66552
T28A			-8.23874	-1.35256	7.08774	-0.83452	7.67636
N21KE31K			9.78302	6.54665	0.478709	5.60279	4.72342

## Sheet: Fig 1 Supp 2B
Vps2 Constructs			Data1	Data2	Data3	Average	Standard Dev
Vector			-7.39343	7.39241		-0.000510326	10.4552
WT			99.8879	100.114		100.001	0.159738
RM13			121.134	122.111	120.906	121.384	0.639937
RM13NT			121.754	122.193	122.172	122.04	0.247078
N21K			51.5039	59.441	63.6361	58.1937	6.1615
E31K			58.1159	68.9768	65.0866	64.0598	5.50279
T28A			90.6813	61.6841	67.702	73.3558	15.3031
N21KE31K			67.1352	50.0891	52.9298	56.718	9.13265

## Sheet: Fig 1 Supp 2D
Fig 1 Supp 2D Vps2 random mutant promoter sequence
>Vps2mutPromoter - 572_m13_PREMIX_BRTK06_10 (21 .. 822) (59 .. 1058) (1000 bp) GGGCTTAATGAGTATTTTATCTGCAATTACGGATACGGTTGGTCTTATGTAGATACATATAAATATATATCTTTTTCTTT CTTTTTCTTAGTCAGGATTGTCGTTTAGCATAATATACATGTAGTTTATTTAATCACATACCACTGATTATCTTTAGAAT TTTATAAATTTTTGAAATAAATGGGTGGCTTTTAATGGTGTCTATGTTAAGTGAAGCTTTTAGAATGCTCTTCCTGCTTT GTTTATTATATGTGTATGTAAGATATGTATGTATTTACATGTGTTTGTAGCGTCCCCAGTCAAAACCTGTGCGCAAT…
