# Supplementary material for: Design principles of the ESCRT-III Vps24-Vps2 module
Source: eLife. 2021 May 24;10:e67709. doi: 10.7554/eLife.67709 (PMC8143795; doi:10.7554/eLife.67709)
Supplement: Figure 3—source data 1. [file elife-67709-fig3-data1.xls]

## Sheet: Fig 3B Source Data
Fig 3B
Construct	Values	Average
pCM189vps24E114K (vps2 MIM)	46.3455	44.4219
pCM189vps24E114K (vps2 MIM)	47.0609
pCM189vps24E114K (vps2 MIM)	39.8592
pCM189vps24E114K (vps2 H5 MIM)	92.0459	93.0646
pCM189vps24E114K (vps2 H5 MIM)	92.572
pCM189vps24E114K (vps2 H5 MIM)	94.5757
pCM189vps24(vps2 H5 MIM)	34.4068	30.7062
pCM189vps24(vps2 H5 MIM)	29.4408
pCM189vps24(vps2 H5 MIM)	28.2709
pCM189vps24E114K (1-142)vps2	75.2864	75.1837
pCM189vps24E114K (1-142)vps2	76.5592
pCM189vps24E114K (1-142)vps2	73.7054
pCM189vps24E114K	20.0033	14.7733
pCM189vps24E114K	13.029
pCM189vps24E114K	11.2876
pCM189vps24	16.7193	9.16915
pCM189vps24	8.86574
pCM189vps24	1.92245
pCM189vps2	99.6676	100
pCM189vps2	99.7544
pCM189vps2	100.578
pCM189	7.6594	2.85e-05
pCM189	-3.36938
pCM189	-4.28994

## Sheet: Fig 3 Supp1
Fig 3 Supp 1 A
Construct	Values	Avera
v24EK-v2H5MIM	85.7684	88.3196
v24EK-v2H5MIM	90.4305
v24EK-v2H5MIM	88.7599
v24-v2H5MIM	97.4534	95.9087
v24-v2H5MIM	94.0727
v24-v2H5MIM	96.2001
v24(1-142)v2	105.832	105.189
v24(1-142)v2	104.766
v24(1-142)v2	104.968
v24(1-119)v2	63.5477	56.7136
v24(1-119)v2	48.8387
v24(1-119)v2	57.7543
24(1-106)v2(107-231)
24(1-106)v2(107-231)
24(1-106)v2(107-231)
v24(1-56)v2	32.4011	34.5895
v24(1-56)v2	34.0009
v24(1-56)v2	37.3666
WT	97.336	100
WT	100.5
WT	102.164
Vector	5.02175	-3.31e-05
Vector	-6.54072
Vector	1.51887
Fig 3 Supp 1B
Construct	Values	Average
v24EK-v2H5MIM	13.0727	15.1788
v24EK-v2H5MIM	13.7431
v24EK-v2H5MIM	18.7206
v24-v2H5MIM	6.66926	8.10188
v24-v2H5MIM	2.75287
v24-v2H5MIM	14.8835
v24(1-142)v2	27.1668	24.4028
v24(1-142)v2	15.2981
v24(1-142)v2	30.7435
v24(1-119)v2	20.8117	18.9133
v24(1-119)v2	21.9258
v24(1-119)v2	14.0025
24(1-106)v2(107-231)	19.495	18.861
24(1-106)v2(107-231)	15.6247
24(1-106)v2(107-231)	21.4633
v24(1-56)v2	23.6053	22.7818
v24(1-56)v2	18.6046
v24(1-56)v2	26.1354

## Sheet: Fig 3 Supp 2
Fig 3 Supp 2A
Construct	Values	Avera
416-Vps2(1-217)-Vps24(213-224)	26.1354	27.0902
416-Vps2(1-217)-Vps24(213-224)	24.8657
416-Vps2(1-217)-Vps24(213-224)	30.2696
416-Vps2(1-164)-Vps24(164-224)	15.7637	16.4383
416-Vps2(1-164)-Vps24(164-224)	18.6991
416-Vps2(1-164)-Vps24(164-224)	14.8521
416-Vps2(1-119)-Vps24(120-224)	10.8088	11.0694
416-Vps2(1-119)-Vps24(120-224)	8.1106
416-Vps2(1-119)-Vps24(120-224)	14.2888
416-Vps2(1-99)-Vps24(101-224)	16.6378	7.77476
416-Vps2(1-99)-Vps24(101-224)	2.42964
416-Vps2(1-99)-Vps24(101-224)	4.25679
416-Vps2(1-56)-Vps24(57-224)	6.26513	7.03217
416-Vps2(1-56)-Vps24(57-224)	8.61459
416-Vps2(1-56)-Vps24(57-224)	6.21679
Vps2	-7.08537	1.28778
Vps2	3.34757
Vps2	7.60113
WT	99.6984	100
WT	99.3142
WT	100.987
Vector	-2.83991	3.79e-05
Vector	4.3297
Vector	-1.48968
Fig 3 Supp 2B
Construct	Values	Average
pcmVps2(1-217)-Vps24(213-224)	14.049	18.0277
pcmVps2(1-217)-Vps24(213-224)	26.5759
pcmVps2(1-217)-Vps24(213-224)	13.4582
pcmVps2(1-164)-Vps24(164-224)	56.6656	56.1275
pcmVps2(1-164)-Vps24(164-224)	52.7751
pcmVps2(1-164)-Vps24(164-224)	58.9417
pcmVps2(1-119)-Vps24(120-224)	53.0236	54.4008
pcmVps2(1-119)-Vps24(120-224)	56.0641
pcmVps2(1-119)-Vps24(120-224)	54.1149
pcmVps2(1-99)-Vps24(101-224)	18.8378	19.4414
pcmVps2(1-99)-Vps24(101-224)	15.4286
pcmVps2(1-99)-Vps24(101-224)	24.058
pcmVps2(1-56)-Vps24(57-224)
pcmVps2(1-56)-Vps24(57-224)
pcmVps2(1-56)-Vps24(57-224)
