# Supplementary material for: Design principles of the ESCRT-III Vps24-Vps2 module
Source: eLife. 2021 May 24;10:e67709. doi: 10.7554/eLife.67709 (PMC8143795; doi:10.7554/eLife.67709)
Supplement: Figure 4—source data 1. [file elife-67709-fig4-data1.csv]

Fig 4B
Construct	Values	Average
Vps24NA (vps2 H5 MIM)	92.86	88.81
Vps24NA (vps2 H5 MIM)	86.29
Vps24NA (vps2 H5 MIM)	87.28
Vps24NG (vps2 H5 MIM)	16.07	22.82
Vps24NG (vps2 H5 MIM)	26.31
Vps24NG (vps2 H5 MIM)	26.08
Fig 4C
Construct	Values	Average
pCM189vps2 (a2/3-24)	77.20255049	77.86583795
pCM189vps2 (a2/3-24)	75.73596476
pCM189vps2 (a2/3-24)	80.65899858
pCM189vps2	31.37459986	35.73703698
pCM189vps2	38.46856242
pCM189vps2	37.36794866
pCM189vps24	100.9650993	99.99996541
pCM189vps24	99.2060058
pCM189vps24	99.82879111
pCM189	-2.620118601	-2.59E-14
pCM189	2.288595931
pCM189	0.33152267
