# Supplementary material for: Design principles of the ESCRT-III Vps24-Vps2 module
Source: eLife. 2021 May 24;10:e67709. doi: 10.7554/eLife.67709 (PMC8143795; doi:10.7554/eLife.67709)
Supplement: Figure 5—figure supplement 1—source data 1. [file elife-67709-fig5-figsupp1-data1.csv]

Fig 5 Supp 1A
Strain Name	Strain	NoMet	WithMet
NBY40	WT	6675.91	773.32
NBY40	WT	7073.21	791.02
NBY40	WT	7684.98	956.49
NBY42	vps20Æ	9798.76	5568.86
NBY42	vps20Æ	9698.4	5470.15
NBY42	vps20Æ	11237	8795
NBY44	snf7Æ	9134.6	7485.75
NBY44	snf7Æ	8255.92	6111.54
NBY44	snf7Æ	11547.33	8375.3
NBY47	vps24Æ	8200.91	6259.65
NBY47	vps24Æ	8186.41	6340.29
NBY47	vps24Æ	8173.28	6379.17
NBY69	vps2Æ	9301.19	7297.55
NBY69	vps2Æ	9140.53	6004.09
NBY69	vps2Æ	9661.21	5792.01
STY45	did2Æ	8824.08	4402.19
STY45	did2Æ	8360.03	4281.55
STY45	did2Æ	7861.81	3598.44
SBY465	vps60Æ	8353.32	4449.43
SBY465	vps60Æ	8334.05	3750.97
SBY465	vps60Æ	7990.02	3553.78
STY34	ist1Æ	7019.38	970.94
STY34	ist1Æ	8195.94	993.27
STY34	ist1Æ	7098.4	965.66
STY25	chm7Æ	7185.42	1097.14
STY25	chm7Æ	8532.25	837.62
STY25	chm7Æ	7537.22	758.75
