# Supplementary material for: Design principles of the ESCRT-III Vps24-Vps2 module
Source: eLife journal article supplement (doi:10.7554/elife.67709), 2021-05-24
Supplement: transrepform [file elife-67709-transrepform-v1.pdf]

## eLife's transparent reporting form

We encourage authors to provide detailed information *within their submission* to facilitate the interpretation and replication of experiments. Authors can upload supporting documentation to indicate the use of appropriate reporting guidelines for health-related research (see [EQUATOR Network](#)), life science research (see the [BioSharing Information Resource](#)), or the [ARRIVE guidelines](#) for reporting work involving animal research. Where applicable, authors should refer to any relevant reporting standards documents in this form.

If you have any questions, please consult our Journal Policies and/or contact us: [editorial@elifesciences.org](mailto:editorial@elifesciences.org).

### Sample-size estimation

- You should state whether an appropriate sample size was computed when the study was being designed
- You should state the statistical method of sample size computation and any required assumptions
- If no explicit power analysis was used, you should describe how you decided what sample (replicate) size (number) to use

Please outline where this information can be found within the submission (e.g., sections or figure legends), or explain why this information doesn't apply to your submission:

Not applicable to our study. Please see replicates information below.

### Replicates

- You should report how often each experiment was performed
- You should include a definition of biological versus technical replication
- The data obtained should be provided and sufficient information should be provided to indicate the number of independent biological and/or technical replicates
- If you encountered any outliers, you should describe how these were handled
- Criteria for exclusion/inclusion of data should be clearly stated
- High-throughput sequence data should be uploaded before submission, with a private link for reviewers provided (these are available from both GEO and ArrayExpress)

Please outline where this information can be found within the submission (e.g., sections or figure legends), or explain why this information doesn't apply to your submission:

Number of cells used and information for flow cytometry quantification is presented in the "materials and methods" section. Western blots, spot plating assays and EM images presented are representative images from at least two independent experiments (different days with independent protein preps for biochemical experiments or different colonies for in vivo experiments). Analyses of MVB sorting is also performed with two different model cargos (Mup1 and Can1) for many mutants, and two assays (cytometry/western) to confirm reproducibility of the defects of the various mutants.

## Statistical reporting

- Statistical analysis methods should be described and justified
- Raw data should be presented in figures whenever informative to do so (typically when N per group is less than 10)
- For each experiment, you should identify the statistical tests used, exact values of N, definitions of center, methods of multiple test correction, and dispersion and precision measures (e.g., mean, median, SD, SEM, confidence intervals; and, for the major substantive results, a measure of effect size (e.g., Pearson's r, Cohen's d)
- Report exact p-values wherever possible alongside the summary statistics and 95% confidence intervals. These should be reported for all key questions and not only when the p-value is less than 0.05.

Please outline where this information can be found within the submission (e.g., sections or figure legends), or explain why this information doesn't apply to your submission:

Mup1-pHluorin sorting data (Figures 1A, 1C, Fig 1 - Supp 1C, 3B, Fig 3 – Supp 1A, Fig 3- Supp 1B, Fig 3 – Supp 2A, Fig 3 – Supp 2B, Fig 4B, 4D, Fig 6C) presented contains bar graphs representing averages, and also the independent replicate denoted by scatter plots. Error bars, when present, in Fig 1 – Supp 1D, Fig 1 Supp 2, and Fig 5 – Supp1A represent standard deviation from 3 independent experiments. This information is also present in the “Materials and Methods” section.

(For large datasets, or papers with a very large number of statistical tests, you may upload a single table file with tests, Ns, etc., with reference to sections in the manuscript.)

## Group allocation

- Indicate how samples were allocated into experimental groups (in the case of clinical studies, please specify allocation to treatment method); if randomization was used, please also state if restricted randomization was applied
- Indicate if masking was used during group allocation, data collection and/or data analysis

Please outline where this information can be found within the submission (e.g., sections or figure legends), or explain why this information doesn't apply to your submission:

Not applicable for this study.

## Additional data files (“source data”)

- We encourage you to upload relevant additional data files, such as numerical data that are represented as a graph in a figure, or as a summary table
- Where provided, these should be in the most useful format, and they can be uploaded as “Source data” files linked to a main figure or table
- Include model definition files including the full list of parameters used
- Include code used for data analysis (e.g., R, MatLab)
- Avoid stating that data files are “available upon request”

Please indicate the figures or tables for which source data files have been provided:

Fig 1, Fig 1 – Supp 1, Fig 1 – Supp 2, Fig 3, Fig 3 – Supp 1, Fig 3 – Supp 2, Fig 4, Fig 5 – Supp 1, Fig 6, Fig 6 Supp 1.
